# Supplementary material for: Study on the grain size control of metatitanic acid in a mixture acid system based on Arrhenius and Boltzmann fitting
Source: Royal Society of Chemistry journal article supplement (doi:10.1039/c9ra08503c), 2020-01-01
Supplement: c9ra08503c1.pdf [file c9ra08503c1.pdf]

## Supporting information

**Table 1** Metatitanic acid grain calculations in different titanium concentrations and temperatures

| Titanium concentration (mol L <sup>-1</sup> ) | Hydrolysis temperature (°C) | Hydrolysis ratio (%) | D(50) (µm) | Grain size (nm) |        |        | n (×10 <sup>3</sup> ) | m (×10 <sup>8</sup> ) | n <sub>i</sub> (×10 <sup>3</sup> ) | n <sub>s</sub> (×10 <sup>3</sup> ) | m <sub>i</sub> (×10 <sup>8</sup> ) | m <sub>s</sub> (×10 <sup>6</sup> ) |
|-----------------------------------------------|-----------------------------|----------------------|------------|-----------------|--------|--------|-----------------------|-----------------------|------------------------------------|------------------------------------|------------------------------------|------------------------------------|
|                                               |                             |                      |            | A               | B      | C      |                       |                       |                                    |                                    |                                    |                                    |
| 1.62                                          | 120                         | 64.57                | 4.158      | 4.202           | 4.202  | 0.4830 | 0.2522                | 44.10                 | 0.1171                             | 0.1351                             | 44.04                              | 9.428                              |
|                                               | 130                         | 96.69                | 5.622      | 6.187           | 6.187  | 0.8739 | 0.9864                | 27.80                 | 0.6755                             | 0.3110                             | 27.75                              | 6.550                              |
|                                               | 140                         | 96.36                | 3.701      | 7.852           | 7.852  | 4.99   | 9.140                 | 0.8620                | 8.294                              | 0.8468                             | 0.8572                             | 0.4812                             |
|                                               | 150                         | 96.69                | 4.308      | 9.347           | 9.347  | 5.857  | 15.17                 | 0.8180                | 13.97                              | 1.195                              | 0.8136                             | 0.4654                             |
| 1.75                                          | 120                         | 73.17                | 2.314      | 4.544           | 4.544  | 0.639  | 0.3896                | 4.910                 | 0.2251                             | 0.1645                             | 4.893                              | 2.063                              |
|                                               | 130                         | 95.12                | 3.314      | 5.686           | 5.686  | 0.520  | 0.4965                | 11.30                 | 0.2523                             | 0.2442                             | 11.30                              | 4.067                              |
|                                               | 140                         | 96.34                | 2.802      | 9.345           | 9.345  | 6.411  | 16.57                 | 0.2060                | 15.32                              | 1.251                              | 0.2039                             | 0.1838                             |
|                                               | 150                         | 93.9                 | 3.591      | 9.858           | 9.858  | 6.133  | 17.61                 | 0.4070                | 16.29                              | 1.323                              | 0.4039                             | 0.2921                             |
| 1.85                                          | 120                         | 72.25                | 2.147      | 5.486           | 5.486  | 0.411  | 0.3649                | 4.190                 | 0.1437                             | 221.183                            | 4.170                              | 0.1183                             |
|                                               | 130                         | 94.22                | 2.459      | 6.633           | 6.633  | 3.803  | 4.934                 | 0.4650                | 4.366                              | 567.662                            | 0.4622                             | 0.1763                             |
|                                               | 140                         | 96.11                | 2.036      | 7.608           | 7.608  | 4.095  | 6.981                 | 0.1860                | 6.254                              | 727.300                            | 1.847                              | 0.3223                             |
|                                               | 150                         | 96.53                | 2.392      | 10.340          | 10.340 | 6.389  | 20.21                 | 0.1050                | 18.76                              | 1453.864                           | 0.1037                             | 2.219                              |
| 1.97                                          | 120                         | 37.23                | 1.908      | 5.307           | 5.307  | 0.373  | 0.3097                | 3.460                 | 0.1051                             | 204.597                            | 3.439                              | 0.1553                             |
|                                               | 130                         | 83.42                | 2.077      | 5.982           | 5.982  | 2.892  | 3.056                 | 0.4530                | 2.631                              | 425.053                            | 0.4502                             | 0.1366                             |
|                                               | 140                         | 97.28                | 2.081      | 8.632           | 8.632  | 4.927  | 10.84                 | 0.1290                | 9.874                              | 968.696                            | 0.1272                             | 0.3235                             |
|                                               | 150                         | 97.83                | 2.312      | 9.622           | 9.622  | 4.633  | 12.70                 | 0.1510                | 11.580                             | 1117.694                           | 0.1493                             | 1.988                              |

**Table 2** The calculation process results

| Titanium concentration (mol L <sup>-1</sup> ) | Hydrolysis temperature (°C) | Cl <sup>-</sup> concentration | SO <sub>4</sub> <sup>2-</sup> concentration | (-)ln(1-η) | 2ln(n <sub>H</sub> +2η) | ln(n <sub>Cl</sub> -1+η) | ln(n <sub>S</sub> -1+η) | 2ln(nw) | -5ln(n <sub>H</sub> +nw+n <sub>Cl</sub> +n <sub>S</sub> +3η+1) |
|-----------------------------------------------|-----------------------------|-------------------------------|---------------------------------------------|------------|-------------------------|--------------------------|-------------------------|---------|----------------------------------------------------------------|
|                                               |                             |                               |                                             |            |                         |                          |                         |         |                                                                |
| 1.62                                          | 110                         | 1                             | 0.7755                                      | 0.1120     | 2.766                   | 0.1007                   | -0.1262                 | 5.792   | -16.09                                                         |
|                                               | 120                         | 1                             | 0.7755                                      | 1.0383     | 3.245                   | 0.4982                   | 0.3515                  | 5.792   | -16.40                                                         |
|                                               | 130                         | 1                             | 0.7755                                      | 3.408      | 3.484                   | 0.6765                   | 0.5552                  | 5.792   | -16.58                                                         |
|                                               | 140                         | 1                             | 0.7755                                      | 3.313      | 3.482                   | 0.6748                   | 0.5533                  | 5.792   | -16.58                                                         |
|                                               | 150                         | 1                             | 0.7755                                      | 3.408      | 3.484                   | 0.6765                   | 0.5552                  | 5.792   | -16.58                                                         |
| 1.75                                          | 110                         | 1                             | 0.4930                                      | 0.1232     | 2.630                   | 0.1097                   | -0.4962                 | 5.509   | -15.47                                                         |
|                                               | 120                         | 1                             | 0.4930                                      | 1.316      | 3.201                   | 0.5491                   | 0.2027                  | 5.509   | -15.87                                                         |
|                                               | 130                         | 1                             | 0.4930                                      | 3.020      | 3.371                   | 0.6684                   | 0.3675                  | 5.509   | -16.007                                                        |
|                                               | 140                         | 1                             | 0.4930                                      | 3.308      | 3.380                   | 0.6747                   | 0.3759                  | 5.509   | -16.017                                                        |
|                                               | 150                         | 1                             | 0.4930                                      | 2.797      | 3.362                   | 0.6622                   | 0.3590                  | 5.509   | -15.60                                                         |
| 1.85                                          | 120                         | 1                             | 0.3112                                      | 1.282      | 3.119                   | 0.5438                   | 0.0332                  | 5.308   | -15.46                                                         |

|      |     |   |        |        |       |        |         |       |         |
|------|-----|---|--------|--------|-------|--------|---------|-------|---------|
|      | 130 | 1 | 0.3112 | 2.851  | 3.296 | 0.6638 | 0.2259  | 5.308 | -15.606 |
|      | 140 | 1 | 0.3112 | 3.247  | 3.310 | 0.6735 | 0.2409  | 5.308 | -15.62  |
|      | 150 | 1 | 0.3112 | 3.361  | 3.313 | 0.6756 | 0.2442  | 5.308 | -15.62  |
|      | 110 | 1 | 0.0983 | 0.0792 | 2.358 | 0.0733 | -1.746  | 5.100 | -14.52  |
| 1.97 | 120 | 1 | 0.0983 | 0.4657 | 2.692 | 0.3165 | -0.7537 | 5.100 | -14.75  |
|      | 130 | 1 | 0.0983 | 1.797  | 3.123 | 0.6067 | -0.0699 | 5.100 | -15.10  |
|      | 140 | 1 | 0.0983 | 3.605  | 3.236 | 0.6795 | 0.0687  | 5.100 | -15.20  |
|      | 150 | 1 | 0.0983 | 3.830  | 3.241 | 0.6822 | 0.0738  | 5.100 | -15.21  |

Table 1 and 2 were the experimental and calculation process in this hydrolysis process.

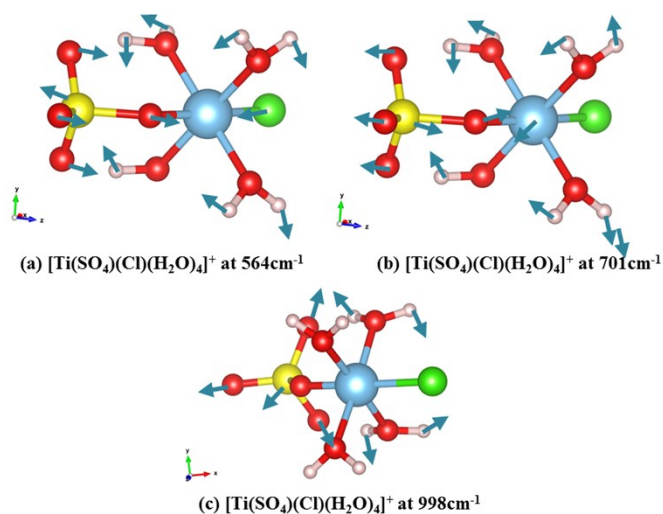

Fig.1 The vibration analysis of  $[\text{Ti}(\text{SO}_4)\text{Cl}(\text{H}_2\text{O})_4]^+$  in different Raman shifts

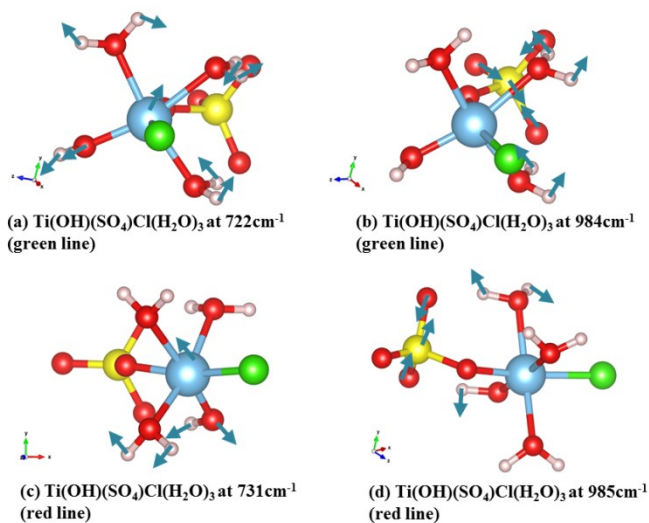

Fig.2 The vibration analysis of  $\text{Ti}(\text{OH})(\text{SO}_4)\text{Cl}(\text{H}_2\text{O})_3$  in different Raman shifts
